# Supplementary material for: Fatty acid transport protein inhibition sensitizes breast and ovarian cancers to oncolytic virus therapy via lipid modulation of the tumor microenvironment
Source: PubMed Central journal article supplement (PMC10036842; doi:10.3389/fimmu.2023.1099459), 2023-03-10

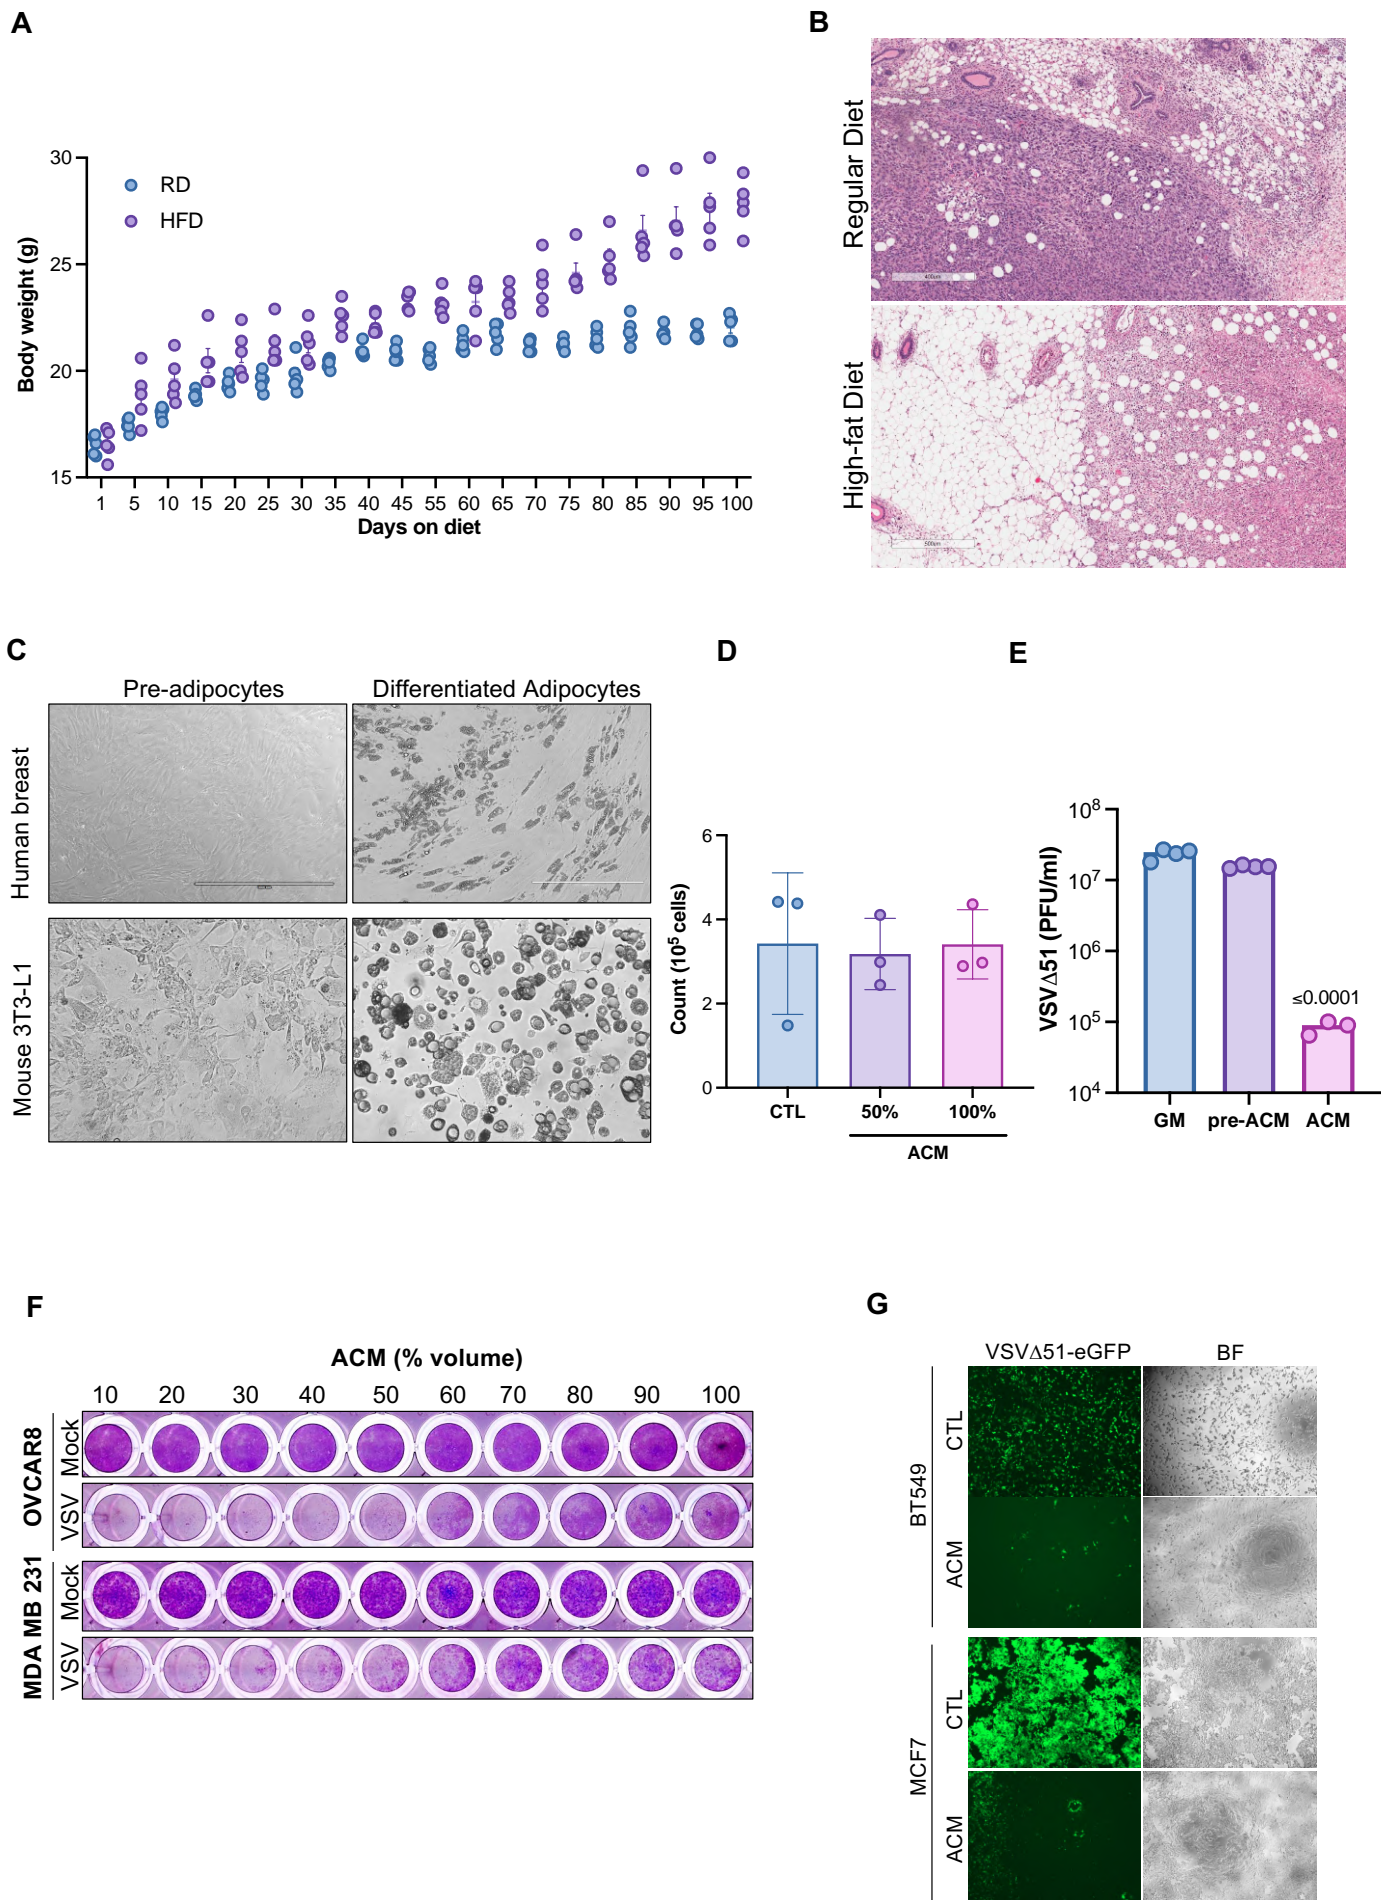

Supplementary Figure 1

**A**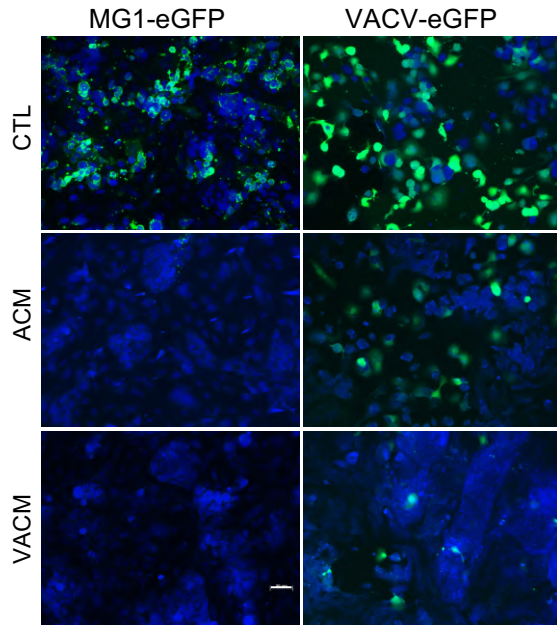**B**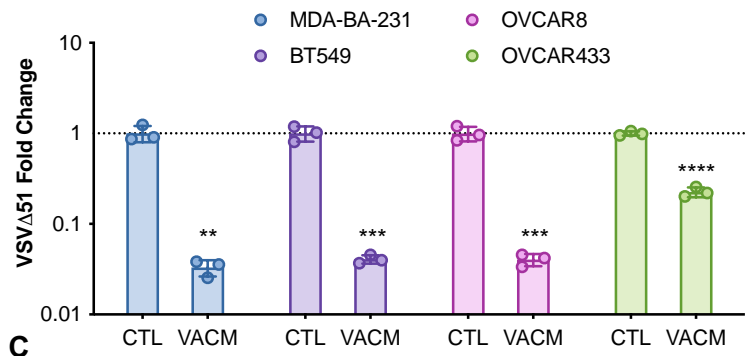**C**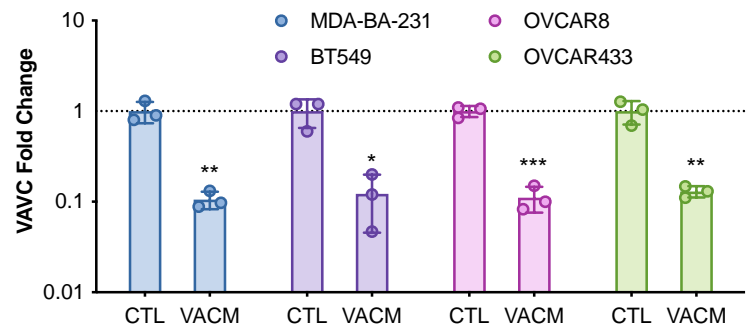**D**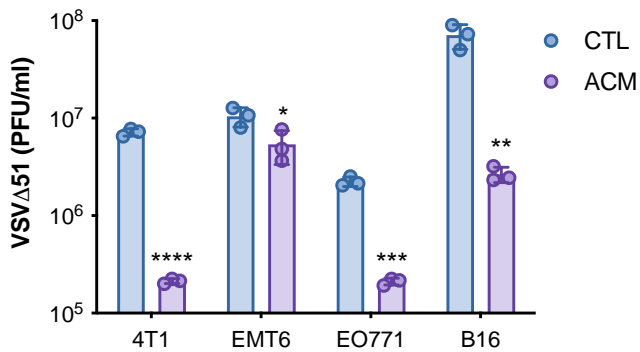**E**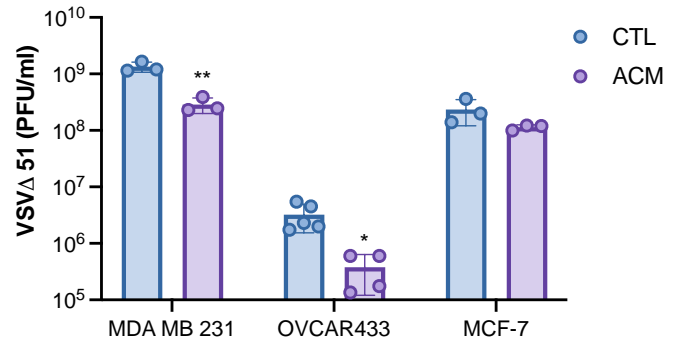**F**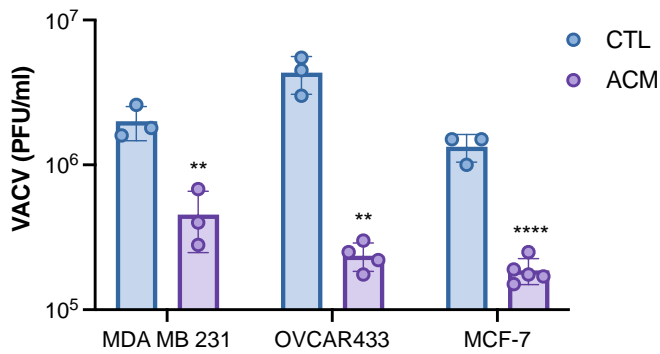

**A**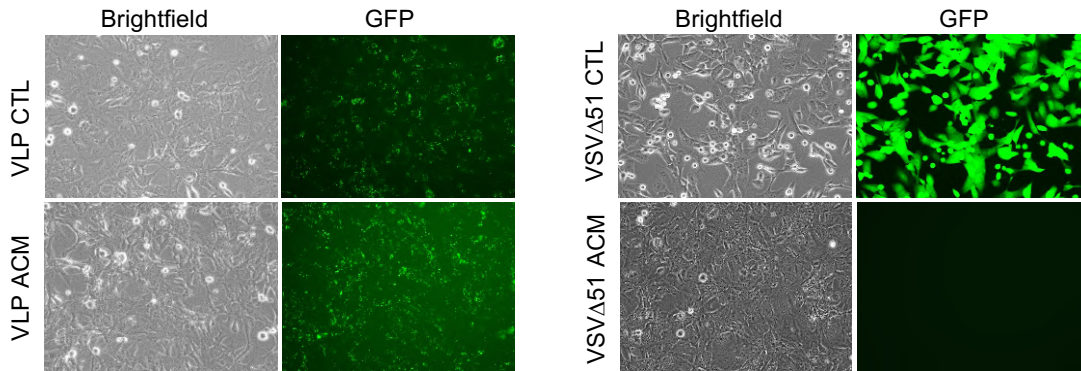**B**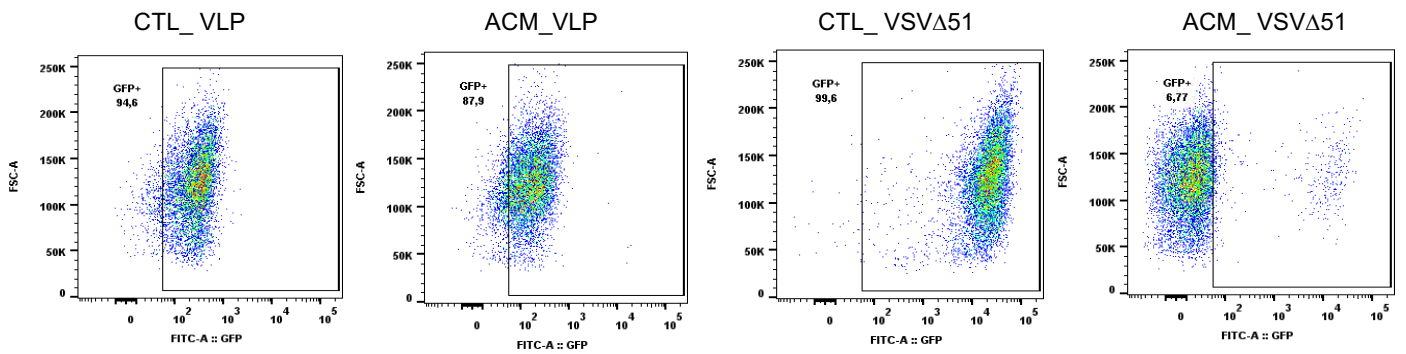**C**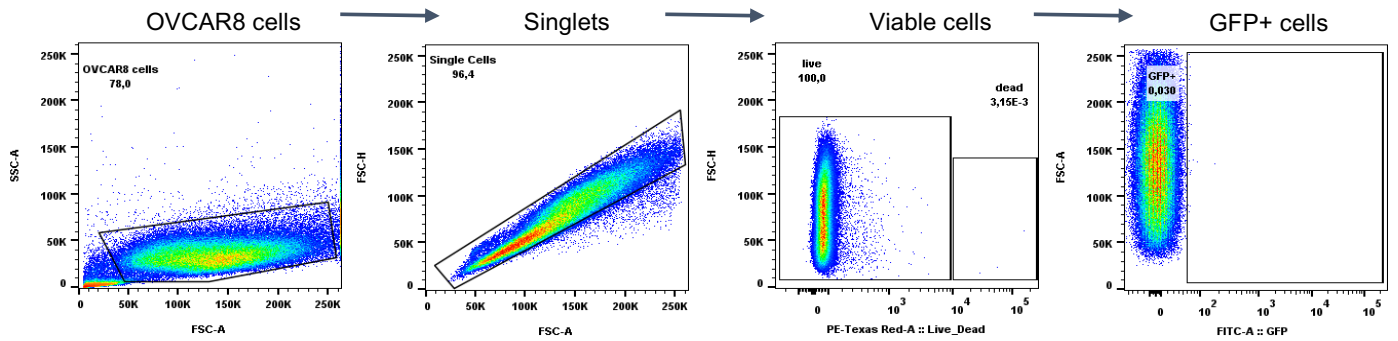



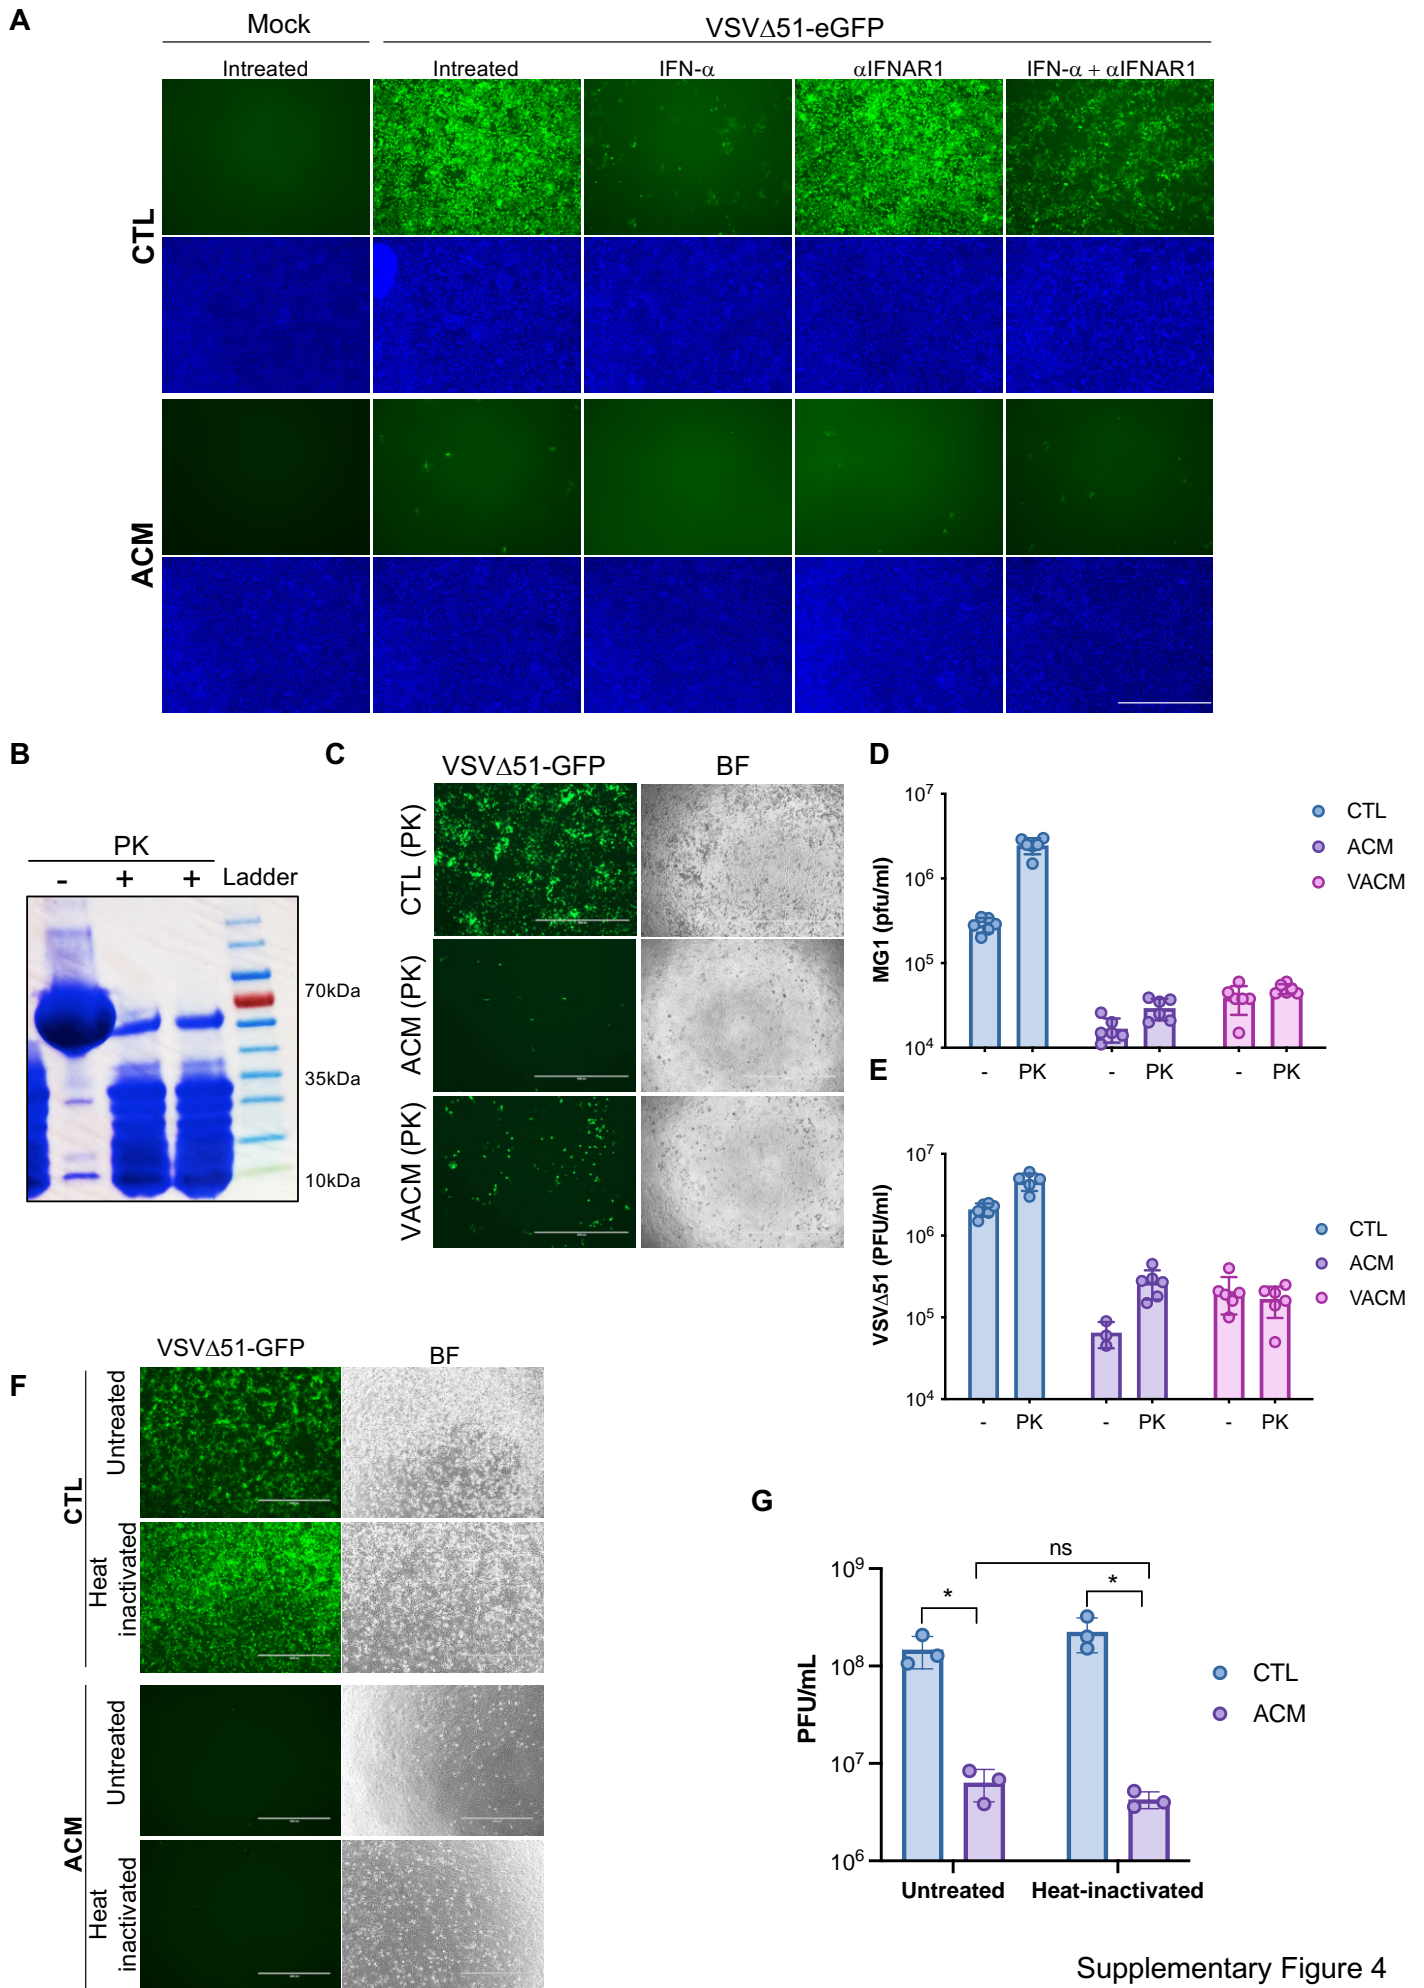

Supplementary Figure 4

**A**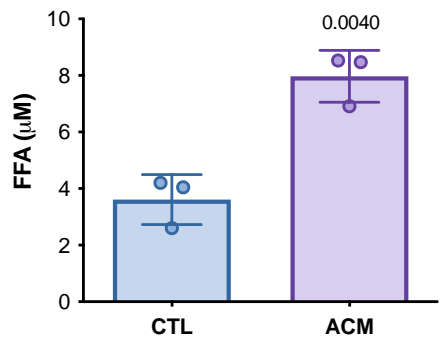**C**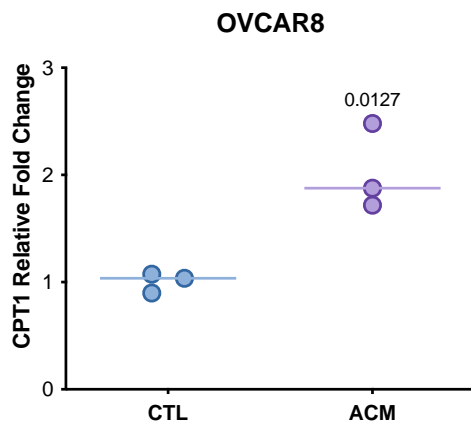**D**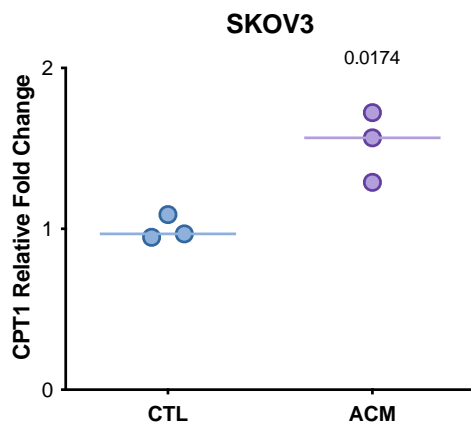**B**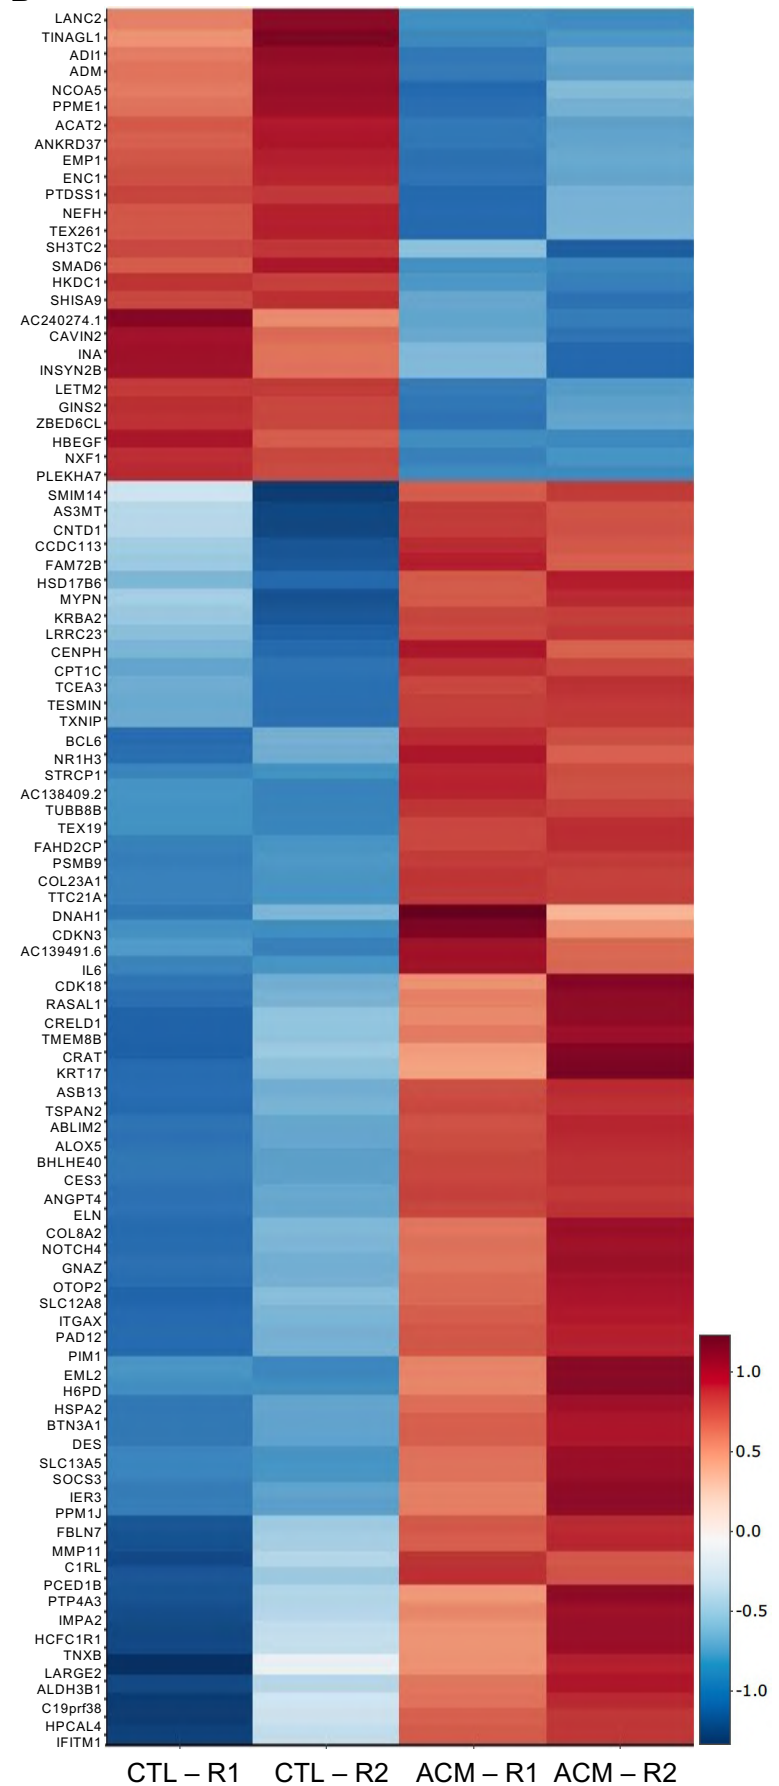

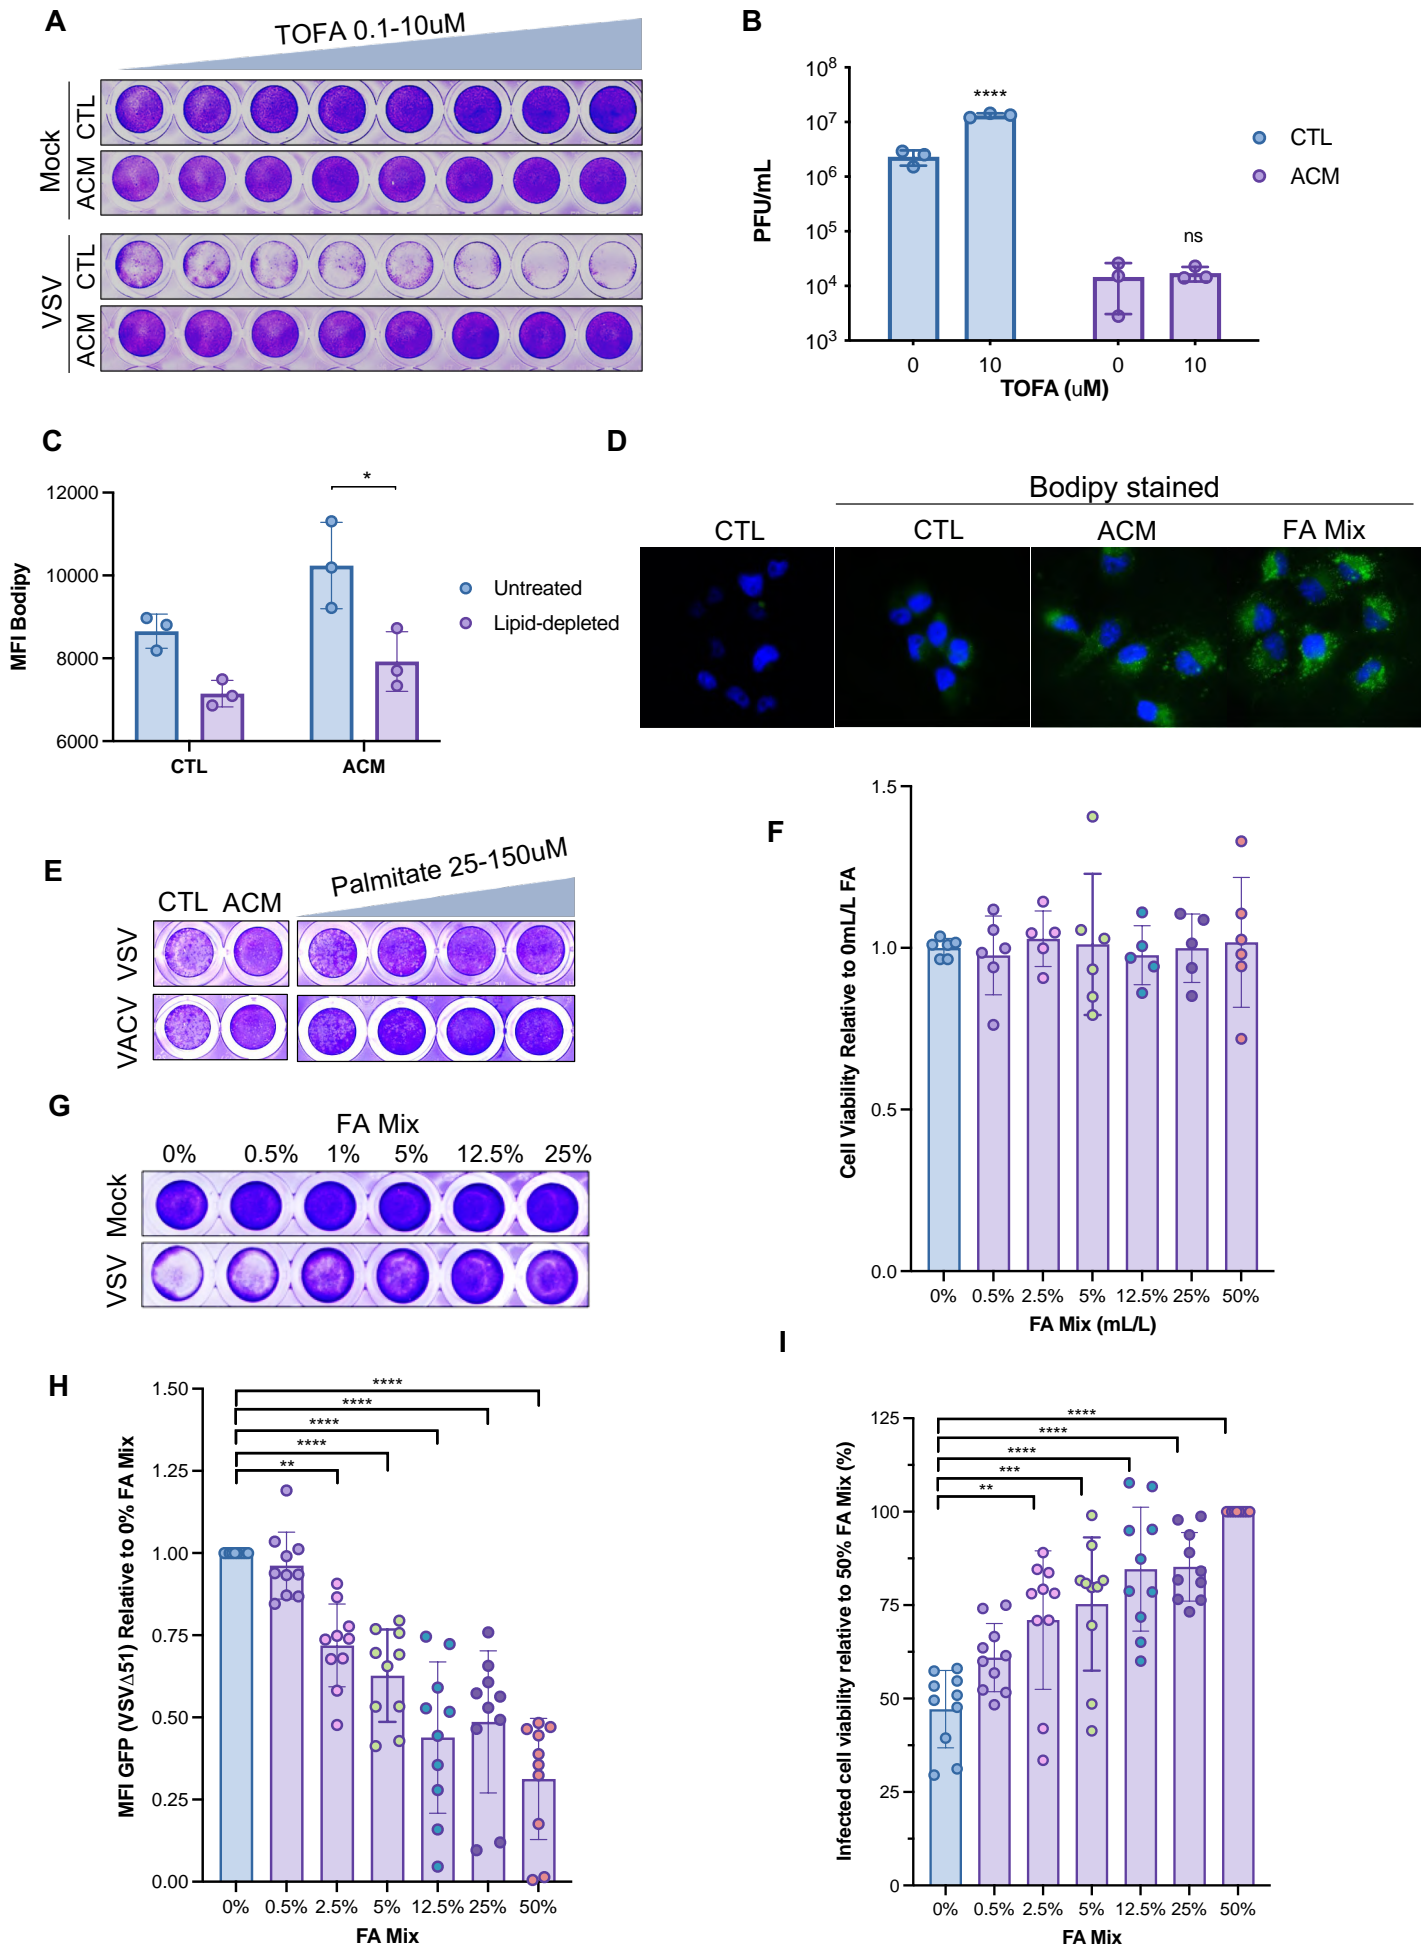



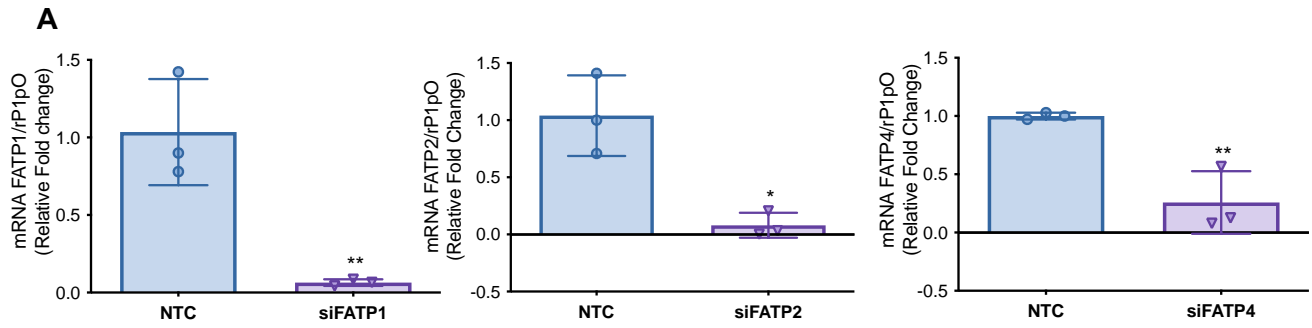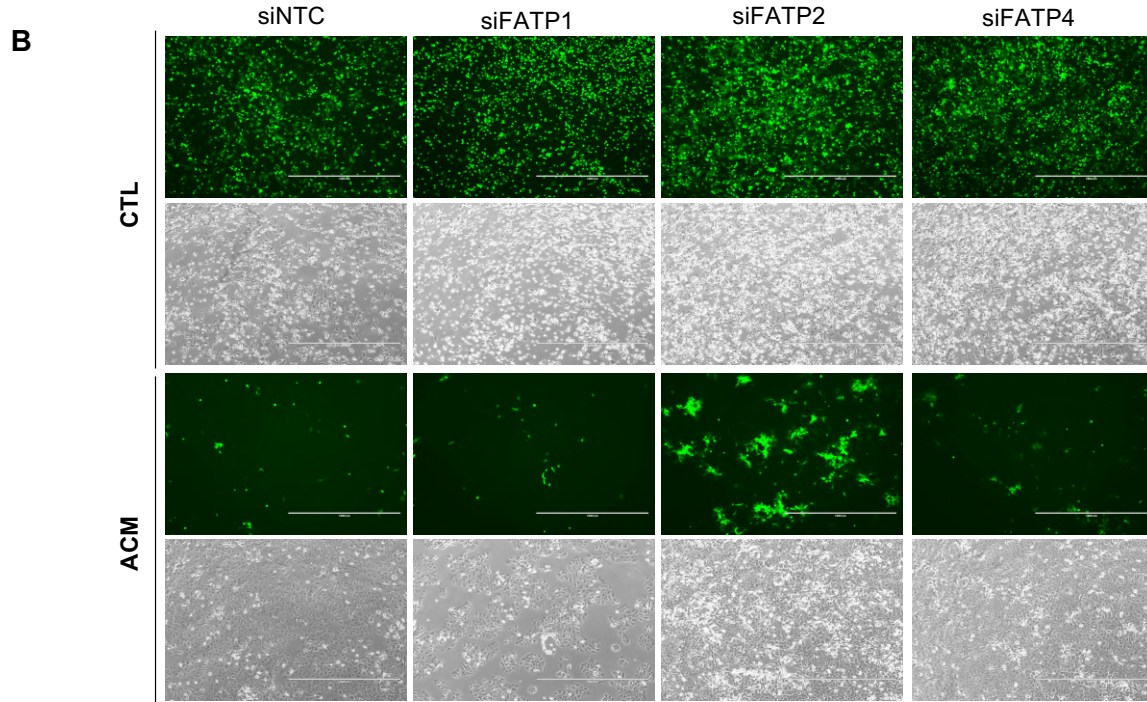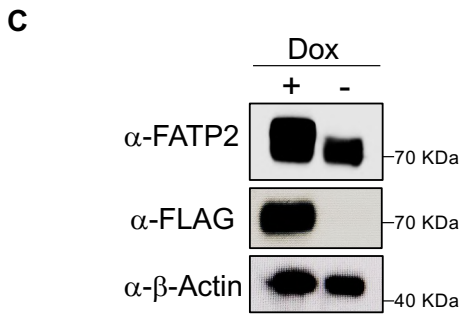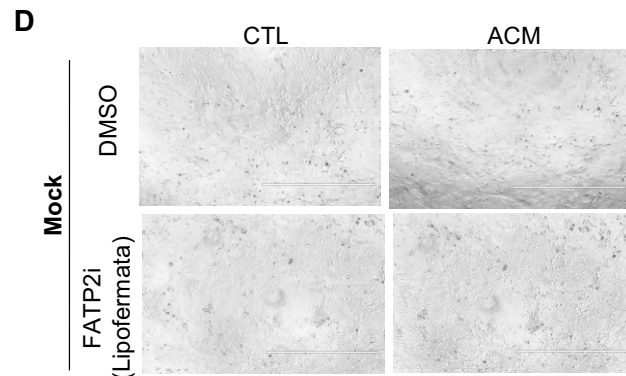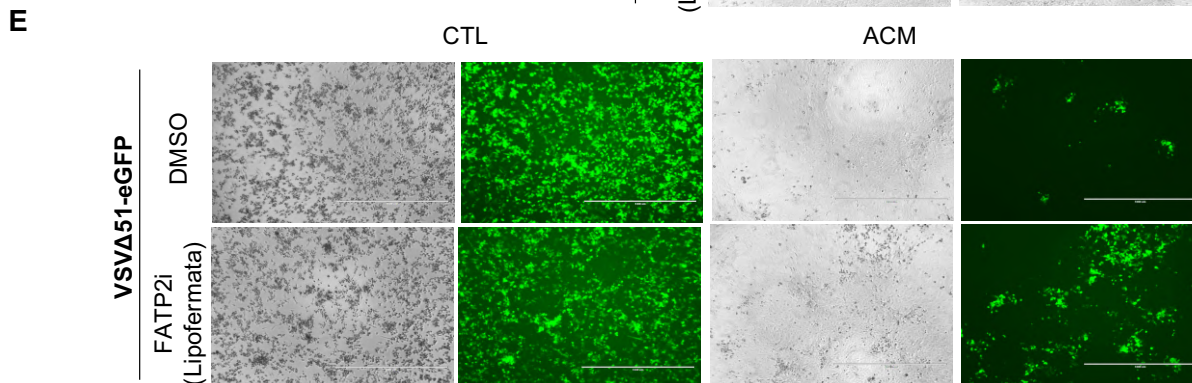

Supplement: DataSheet_1.pdf [file DataSheet_1.pdf]
